# Supplementary material for: A 13-Gene Signature Based on Estrogen Response Pathway for Predicting Survival and Immune Responses of Patients With UCEC
Source: Frontiers journal article supplement (doi:10.3389/fmolb.2022.833910), 2022-04-26
Supplement: Data_Sheet_1.pdf [file Data_Sheet_1.pdf]

## SUPPLEMENTAL FIGURES

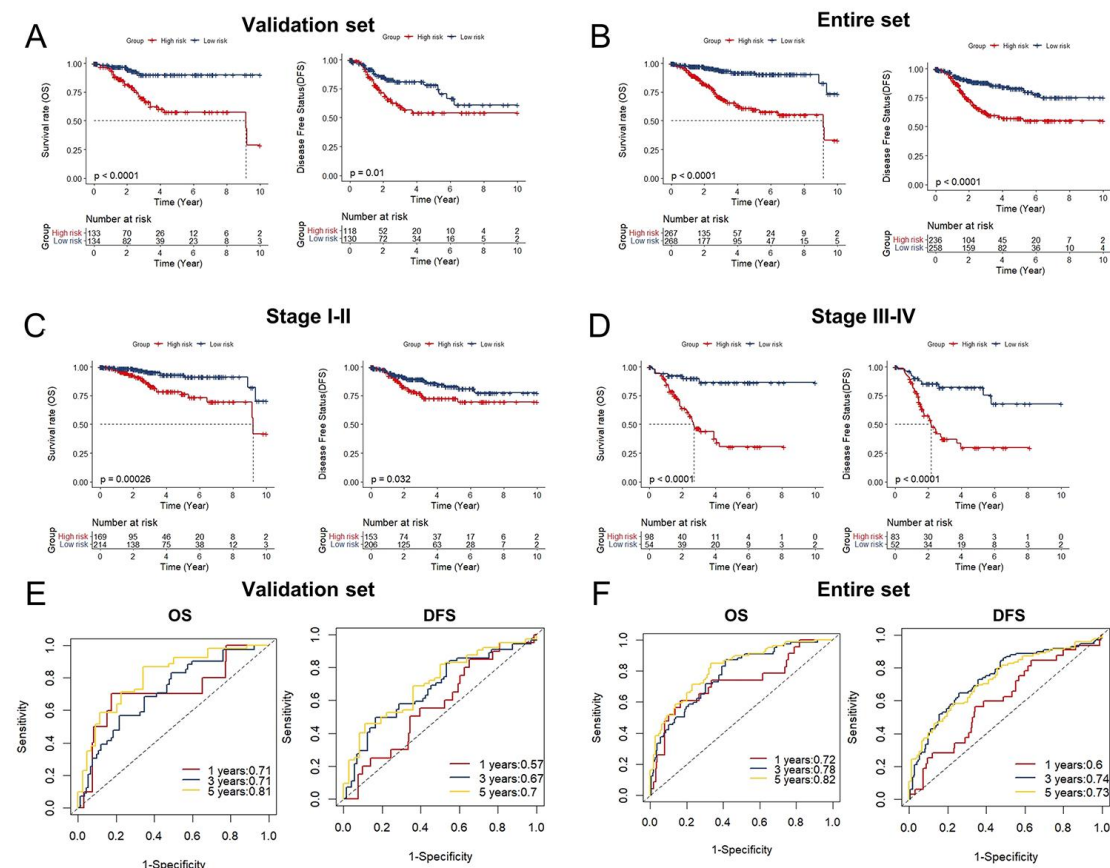

### Supplement 1. Survival analyses of the low- and high-risk groups patients.

A, B. Kaplan–Meier survival analyses of the low- and high-risk groups patients in the validation set (A) and the entire set (B).

C, D. Kaplan–Meier survival analyses of the low- and high-risk groups patients at stage I–II (C) and stage III–IV (D).

E, F. ROC curve analyses according to the 1, 3, 5-year survival of the area under the AUC value in the validation set(E) and the entire set(F).

A

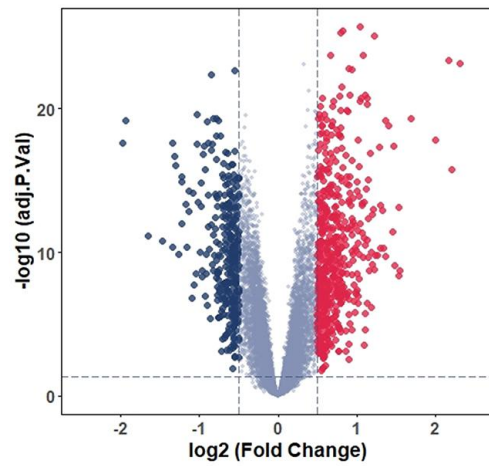

B

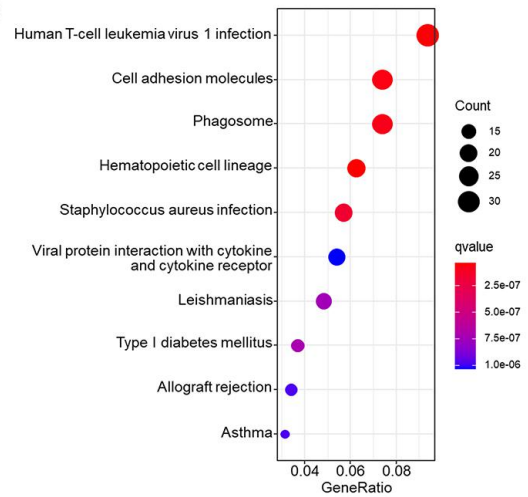

## Supplement 2. Comprehensive analyses of enriched pathways in different risk groups.

A. Volcano plot representing 504 risk-related DEGs between low- and high-risk groups.

B. KEGG analysis of 504 risk-related DEGs. The size of the balls indicating the number of genes and color indicating q value.

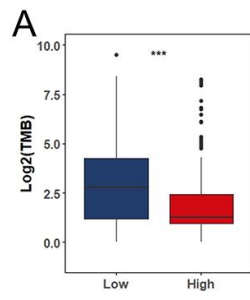

**Supplement 3. Comparison of genomic alterations in different risk groups**

A. The tumor mutation burden in the low- and high-risk groups.
